# Supplementary material
Source: publisher figshare collection journal article supplement (https://frontiersin.figshare.com/ndownloader/files/28223958)
Supplement: Supplementary file [file 28223958]

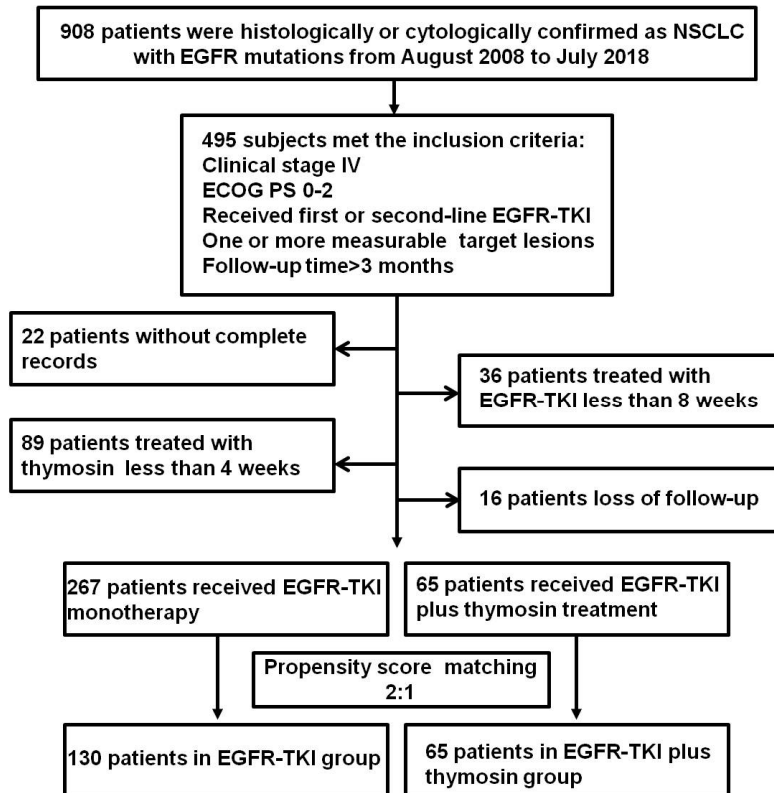

**Supplementary Figure 1. Study flowchart.**
